# Supplementary material
Source: publisher figshare collection journal article supplement (https://aacr.figshare.com/articles/dataset/_/22479113)
Supplement: Supplementary file 1 [file 39930617]

Figure S1

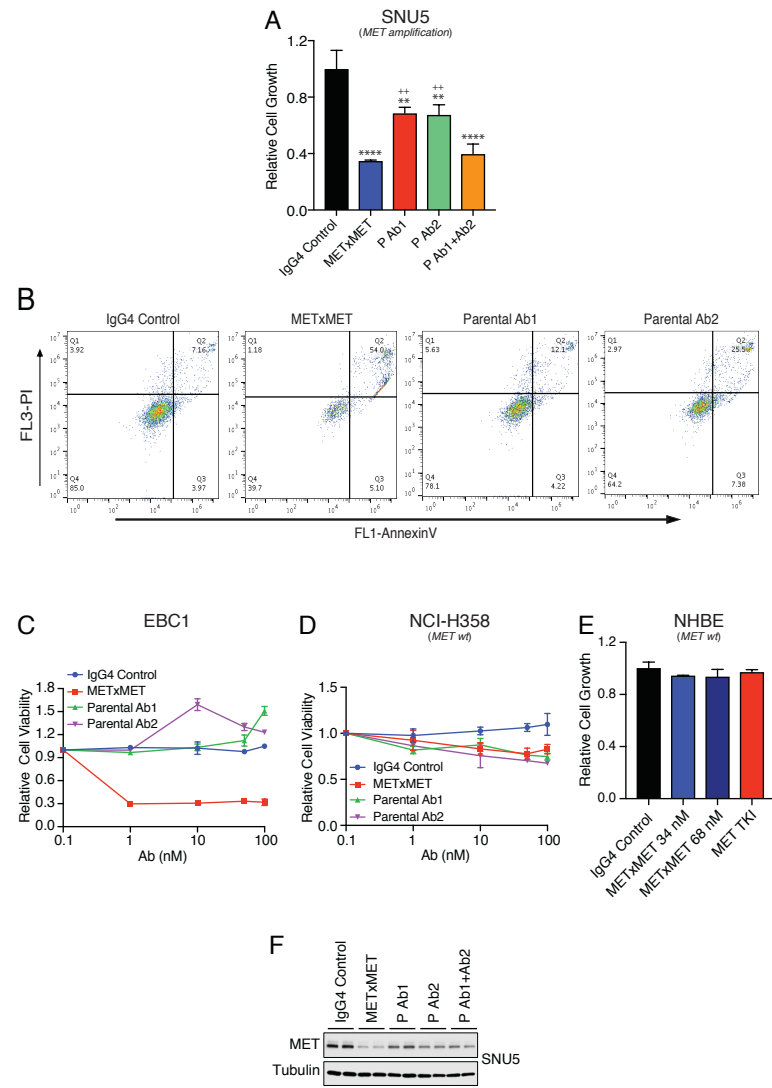

Figure S2

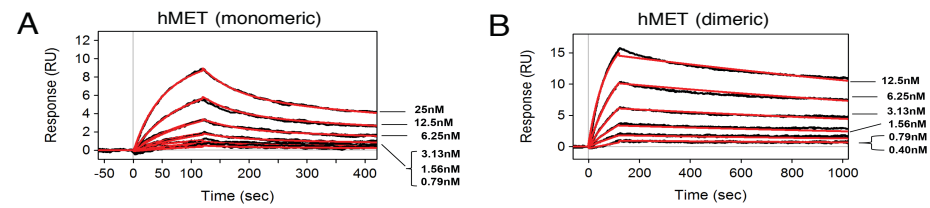

| Protein injected over surface-captured METxMET | Kinetic Binding Parameters |                       |                        |                 |                           |                       |                       |                 |
|------------------------------------------------|----------------------------|-----------------------|------------------------|-----------------|---------------------------|-----------------------|-----------------------|-----------------|
|                                                | $k_a1$ ( $M^{-1}s^{-1}$ )  | $k_d1$ ( $s^{-1}$ )   | $K_D1$ (M)             | $t_{1/2}$ (min) | $k_a2$ ( $M^{-1}s^{-1}$ ) | $k_d2$ ( $s^{-1}$ )   | $K_D2$ (M)            | $t_{1/2}$ (min) |
| hMET (monomeric)                               | $6.70 \times 10^5$         | $1.76 \times 10^{-2}$ | $2.63 \times 10^{-9}$  | 0.7             | $4.45 \times 10^5$        | $1.17 \times 10^{-3}$ | $2.63 \times 10^{-9}$ | 9.9             |
| hMET (dimeric)                                 | $1.11 \times 10^6$         | $3.59 \times 10^{-4}$ | $3.22 \times 10^{-10}$ | 32.2            | NA                        | NA                    | NA                    | NA              |

$k_a$ , association rate constant;  $k_d$ , dissociation rate constant;  $K_D$ , equilibrium dissociation constant;  $t_{1/2}$ , dissociative half-life; NA, not applicable because kinetic parameters were determined using a 1:1 binding model. Due to biphasic dissociation of monomeric MET proteins, the kinetic parameters were determined using a heterogeneous ligand binding model.

Figure S3

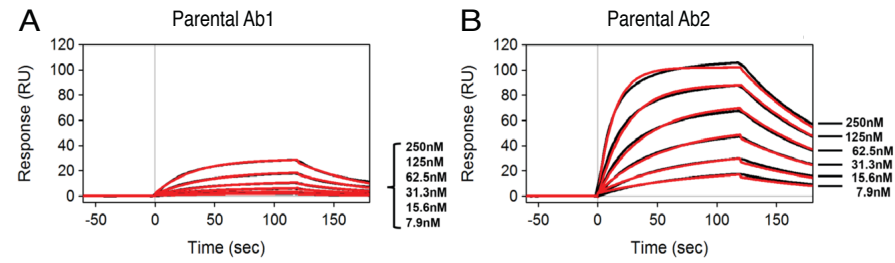

| Kinetic Binding Parameters |                                                            |                          |                       |                       |                 |
|----------------------------|------------------------------------------------------------|--------------------------|-----------------------|-----------------------|-----------------|
|                            | Protein injected over surface captured parental antibodies | $k_a$ ( $M^{-1}s^{-1}$ ) | $k_d$ ( $s^{-1}$ )    | $K_D$ (M)             | $t_{1/2}$ (min) |
| Parental Ab1               | hMET (monomeric)                                           | $6.36 \times 10^4$       | $1.61 \times 10^{-2}$ | $2.53 \times 10^{-7}$ | 0.7             |
| Parental Ab2               | hMET (monomeric)                                           | $2.56 \times 10^5$       | $1.03 \times 10^{-2}$ | $4.01 \times 10^{-8}$ | 1.1             |

$k_a$ , association rate constant;  $k_d$ , dissociation rate constant;  $K_D$ , equilibrium dissociation constant;  $t_{1/2}$ , dissociative half-life. Kinetic parameters were determined using a 1:1 binding model.

Figure S4

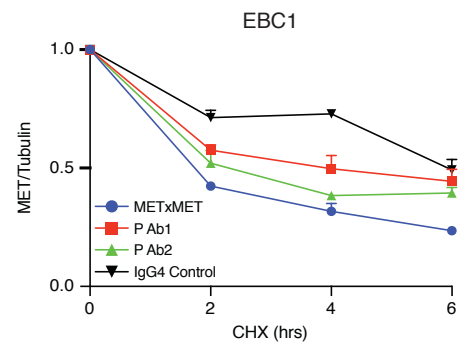

Figure S5

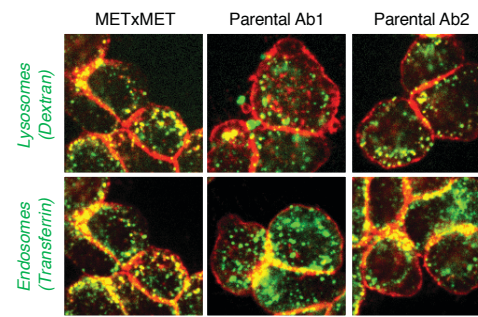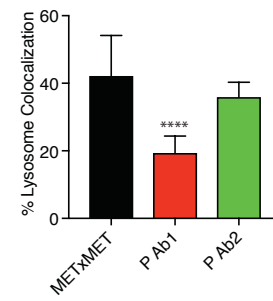

Figure S6

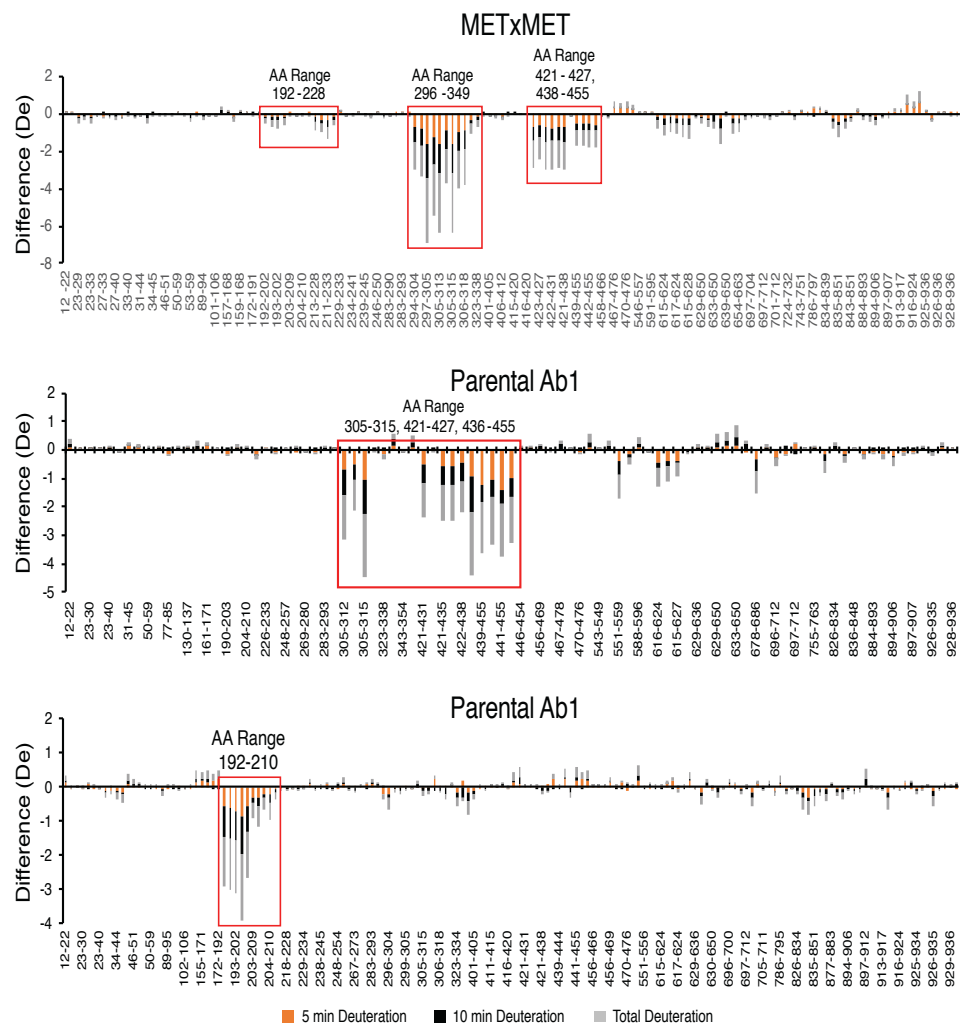

Table S1. Activation of MET-dependent gene expression by conventional antibodies

| Conventional MET Ab | Luciferase activity (fold over untreated) | EC50 (M)    |
|---------------------|-------------------------------------------|-------------|
| Ab 1                | 14.4                                      | 3.70E -12   |
| Ab 2*               | 10.9                                      | 1.20E -10   |
| Ab 3*               | 9.8                                       | 1.30E -11   |
| Ab 4                | 9.8                                       | 7.70E -13   |
| Ab 5                | 9.2                                       | not sigmoid |
| Ab 6                | 7.1                                       | 2.30E -12   |
| Ab 7                | 5.2                                       | 3.00E -10   |
| Ab 8                | 4.8                                       | 1.80E -10   |
| Ab 9                | 4.3                                       | 1.90E -10   |
| Ab 10               | 3.1                                       | 4.70E -10   |
| Ab 11               | 2.8                                       | 3.00E -10   |
| Ab 12               | 2.8                                       | 4.80E -10   |
| Ab 13               | 2.7                                       | 3.90E -10   |
| Ab 14               | 2.3                                       | 4.70E -11   |
| Ab 15               | 1.8                                       | 1.20E -09   |
| Ab 16               | 1.7                                       | 1.40E -11   |
| Ab 17               | 1.6                                       | 4.40E -10   |
| Ab 18               | 1.4                                       | 1.90E -09   |
| Ab 19               | 1.2                                       | not sigmoid |

Luciferase reporter gene expression (driven by serum response element) was determined in HEK293 cells

\* Parental antibodies selected for generation of the METxMET biparatopic antibody

Table S2. The MET biparatopic antibody binds to non-overlapping epitopes of human MET

| First Antibody Injected (Pre-bound Ab) | First Antibody Binding Signal (RU) | Second Antibody Injected | Binding Signal (RU) | Percent Blocking |
|----------------------------------------|------------------------------------|--------------------------|---------------------|------------------|
| <b>METxMET</b>                         | 150.9 ± 0.2                        | METxMET                  | 0.6                 | 100.0            |
|                                        |                                    | Parental Ab1             | 4.7                 | 94.7             |
|                                        |                                    | Parental Ab2             | -8.3                | 113.7            |
|                                        |                                    | Control Ab               | -12.4               | NC               |
| <b>Parental Ab1</b>                    | 115.4 ± 2.0                        | METxMET                  | 82.3                | 27.2             |
|                                        |                                    | Parental Ab1             | 0.7                 | 100.0            |
|                                        |                                    | Parental Ab2             | 44.2                | 25.2             |
|                                        |                                    | Control Ab               | -24.4               | NC               |
| <b>Parental Ab2</b>                    | 85.9 ± 0.4                         | METxMET                  | 90.0                | 20.4             |
|                                        |                                    | Parental Ab1             | 70.7                | 7.8              |
|                                        |                                    | Parental Ab2             | -0.2                | 100.0            |
|                                        |                                    | Control Ab               | -8.6                | NC               |
| <b>IgG4 Control</b>                    | 2.6 ± 2.5                          | METxMET                  | 112.9               | 0.0              |
|                                        |                                    | Parental Ab1             | 76.6                | 0.0              |
|                                        |                                    | Parental Ab2             | 59.2                | 0.0              |
|                                        |                                    | Control Ab               | -0.2                | NC               |

Percent blocking was calculated by using the following formula:

$$\% \text{ Blocking} = 100 - (\text{Binding Signal} - \text{Self-Self}) / (\text{Maximum Binding Signal} - \text{Self-Self}) * 100$$

Where Binding Signal is defined as the response generated by the second Ab injected over pre-bound first Ab.

Self-Self is defined as the binding response when the second Ab is injected over itself pre-bound to the surface.

Maximum Binding Signal is defined as the difference between the binding signal generated by each antibody injected over pre-bound control antibody.

Abbreviations: NC, not calculated because dividing by 0 is undefined.
